# Supplementary material for: A Novel Hepe-Like Virus from Farmed Giant Freshwater Prawn Macrobrachium rosenbergii
Source: MDPI journal article supplement (doi:10.3390/v12030323), 2020-03-17

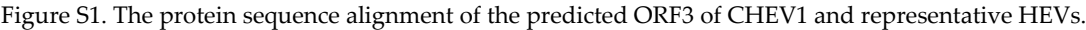

Supplement: s1 [file s1]
